# Supplementary material for: Antioxidant and Anti-Inflammatory Activities of Six Flavonoids from Smilax glabra Roxb
Source: PubMed Central journal article supplement (PMC7697956; doi:10.3390/molecules25225295), 2020-11-13
Supplement: molecules-25-05295-s001.pdf [file molecules-25-05295-s001.pdf]

# Supplementary Materials: Antioxidant and anti-inflammatory activities of six flavonoids from *Smilax glabra* Roxb

Xinyu Zhao<sup>†</sup>, Ruyi Chen<sup>†</sup>, Yueyue Shi<sup>†</sup>, Xiaoxi Zhang, Chongmei Tian and Daozong Xia<sup>\*</sup>

College of Pharmaceutical Sciences, Zhejiang Chinese Medical University, Hangzhou 310053, China;

201811113911453@zcmu.edu.cn (X.Z.); 201911113911468@zcmu.edu.cn (R.C.);

201911113911469@zcmu.edu.cn (Y.S.); 20201059@zcmu.edu.cn (X.Z.); m18042307982@163.com (C.T.)

<sup>\*</sup> Correspondence: xdz\_zjtcn@hotmail.com or xiadaozong@zcmu.edu.cn; Tel./Fax: +86-571-61768535

<sup>†</sup> These authors contributed equally to this work.

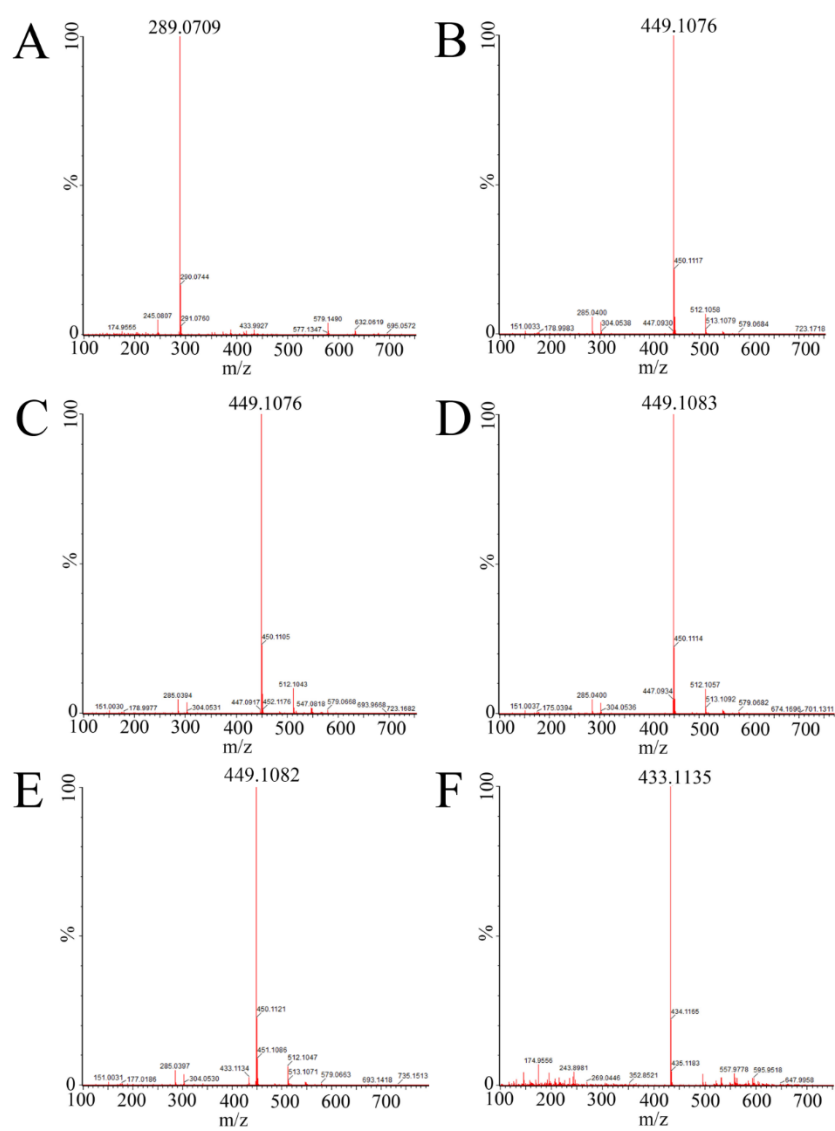

**Figure S1.** The mass spectra of six flavonoids in *Smilax glabra* flavonoids extract (SGF). A: (-)-epicatechin; B: neoastilbin; C: astilbin; D: neoisoastilbin; E: isoastilbin; F: engeletin.

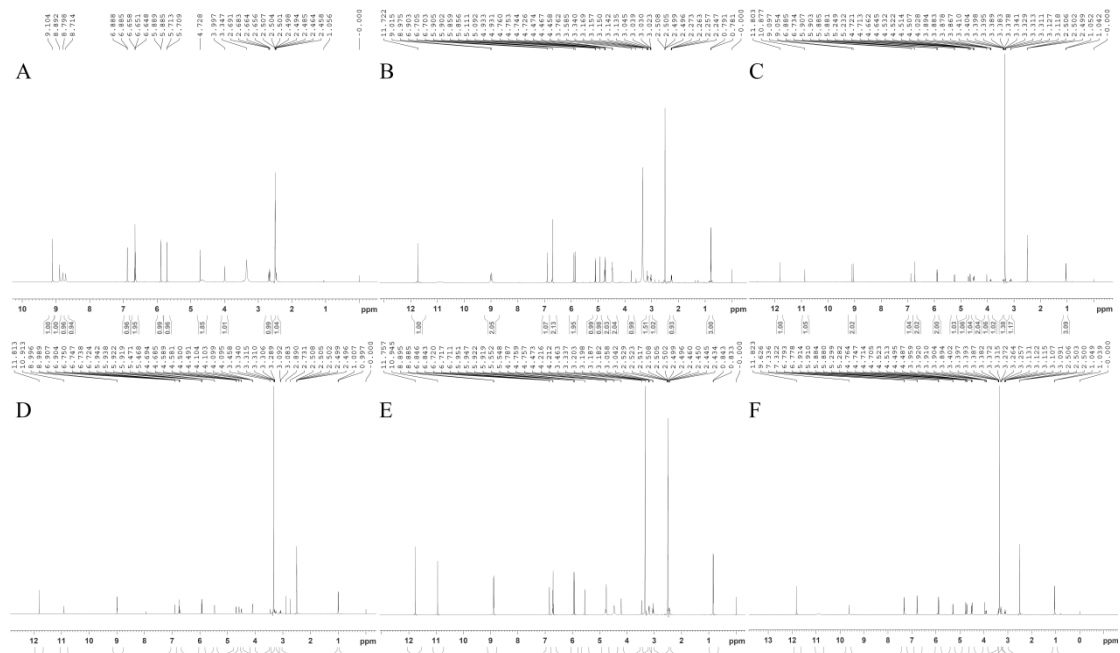

**Figure S2.** The  $^1\text{H}$  NMR spectra of six flavonoids in *Smilax glabra* flavonoids extract (SGF). A: (-)-epicatechin; B: neoastilbin; C: astilbin; D: neoisoastilbin; E: isoastilbin; F: engeletin.

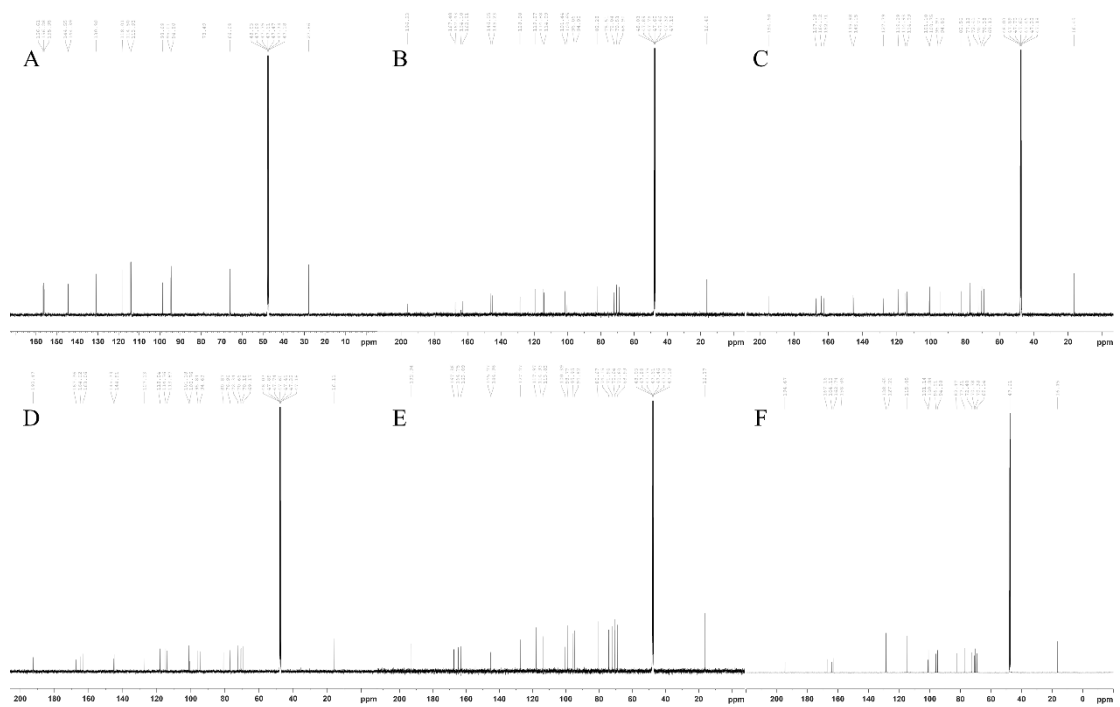

**Figure S3.** The  $^{13}\text{C}$  NMR spectra of six flavonoids in *Smilax glabra* flavonoids extract (SGF). A: (-)-epicatechin; B: neoastilbin; C: astilbin; D: neoisoastilbin; E: isoastilbin; F: engeletin.

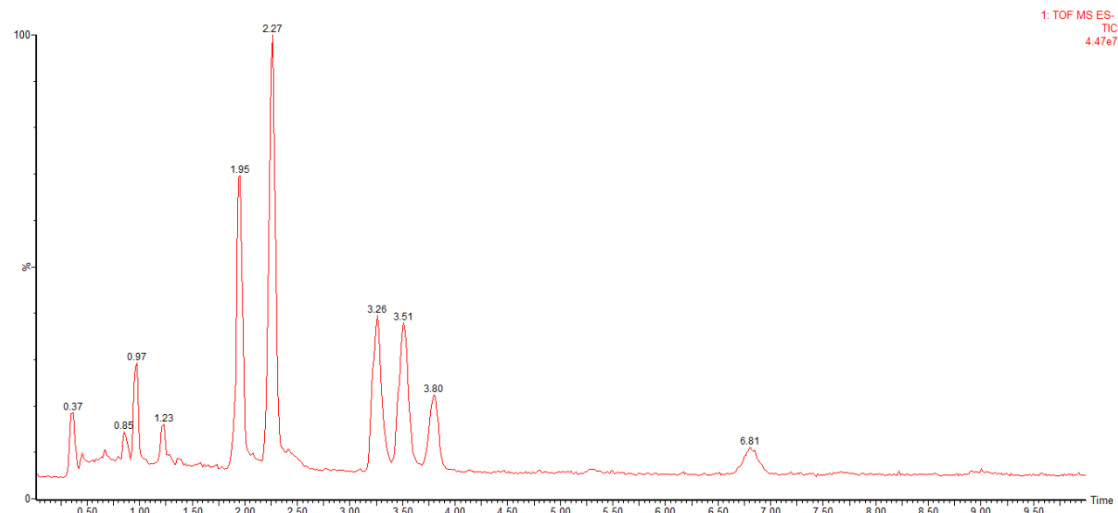

**Figure S4.** The total ion current (TIC) of *Smilax glabra* flavonoids extract (SGF).
